# Supplementary material for: Intelligent catalase-coated MnO 2 nanoparticles with programmed oxygen supply and glutathione depletion for enhanced photodynamic therapy
Source: Royal Society of Chemistry journal article supplement (doi:10.1039/d5tb01925g), 2025-11-20
Supplement: d5tb01925g1.pdf [file d5tb01925g1.pdf]

## Supplementary Information

### Intelligent Catalase-coated MnO<sub>2</sub> Nanoparticles with Programmed Oxygen Supply and Glutathione Depletion for Enhanced Photodynamic Therapy

Weijuan Jia<sup>a</sup>, Aoxue Zhang<sup>a</sup>, Haiwei Hou<sup>a</sup>, Yazhong Bu<sup>a</sup>, Di Liu<sup>b,\*</sup>, Ching-Husan Tung<sup>c,\*</sup>, Baoji Du<sup>a,\*</sup>

<sup>a</sup> Institute of Medical Engineering, Department of Biophysics, School of Basic Medical Sciences, Health Science Center, Xi'an Jiaotong University, Xi'an, 710061, China

<sup>b</sup> Institute of Molecular and Translational Medicine, and Department of Biochemistry and Molecular Biology, Xi'an Jiaotong University Health Science Center, Xi'an, 710061, China

<sup>c</sup> Molecular Imaging Innovations Institute, Department of Radiology, Weill Cornell Medicine, New York, New York 10065, United States

\*Corresponding authors: baojidu@xjtu.edu.cn (B. Du), chingtung987@gmail.com (C. Tung), diliu2022@xjtu.edu.cn (D. Liu)

#### Experimental

##### Materials

MnCl<sub>2</sub>·4H<sub>2</sub>O, Chlorin e6 (Ce6), 1,3-Diphenylisobenzofuran (DPBF), Tris (4,7-diphenyl-1,10-phenanthroline) ruthenium (II) dichloride complex ([Ru(dpp)<sub>3</sub>]Cl<sub>2</sub>, RDPP) and GSH detection kit were purchased from Shanghai Macklin Biochemical Co., Ltd (China). Human Serum Albumin and Catalase was purchased from Sigma-Aldrich (USA). Hoechst 33342, Thiazolyl blue tetrazolium bromide (MTT) and Live/Dead Cell Staining Kit were purchased from Beijing Solarbio Science & Technology Co., Ltd (China). Mito-Tracker Green and Lyso-Tracker Red were purchased from Beyotime Biotechnology (China). Dulbecco's modified Eagle's medium (DMEM) was obtained from Gibco Life Technologies (USA). Fetal bovine serum (FBS) was purchased from Biosharp Life Sciences (China).

##### Instrumental methods

The morphology of the nanoparticles was examined using a Talos-L120C transmission electron microscopy (Thermo Fischer, USA). Elemental mapping of MH@CAT was conducted with a Talos-F200X Lorenz transmission electron

microscopy (Thermo Fischer, USA). The particle size and zeta potentials of the nanoparticles were characterized by a Litesizer-500 instrument (Anton-Paar, USA). X-ray photoelectron spectroscopy analysis of MH@CAT was performed using an ESCALAB-250Xi spectrometer (Thermo Fischer, USA). UV–vis absorption spectra were recorded with a UV-L6 spectrometer (Youke, China). The production of O<sub>2</sub> was monitored using a DO-957 portable dissolved oxygen meter (INESA, China). Cell fluorescence images were captured using a FV3000 confocal laser scanning microscope (Olympus, Japan). Fluorescence imaging was acquired using the Smart-LF VISQUE in vivo imaging system (Vieworks, Korea).

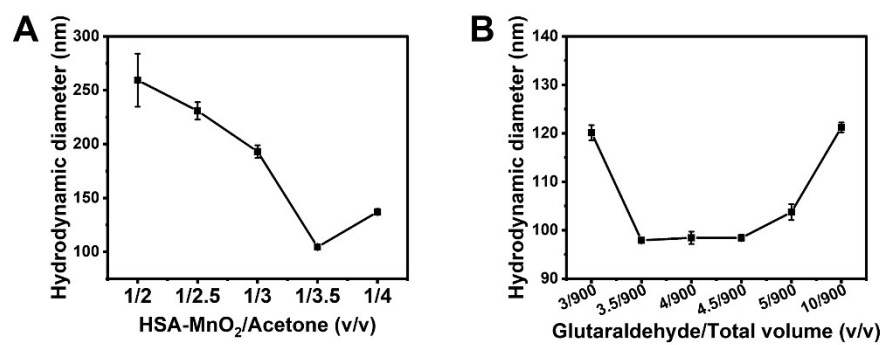

Fig. S1 Optimized the amount of (A) acetone and (B) cross-linking glutaraldehyde for MH preparation.

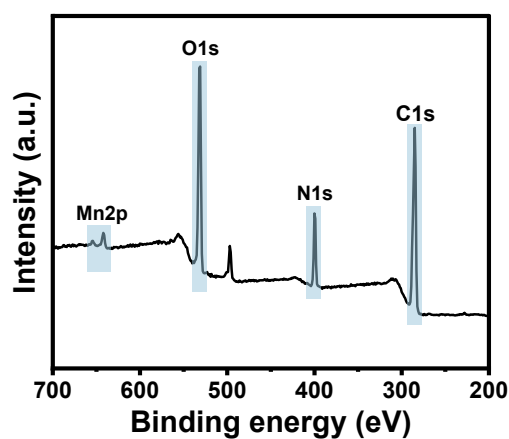

Fig. S2 HR-XPS spectrum of MH@CAT.

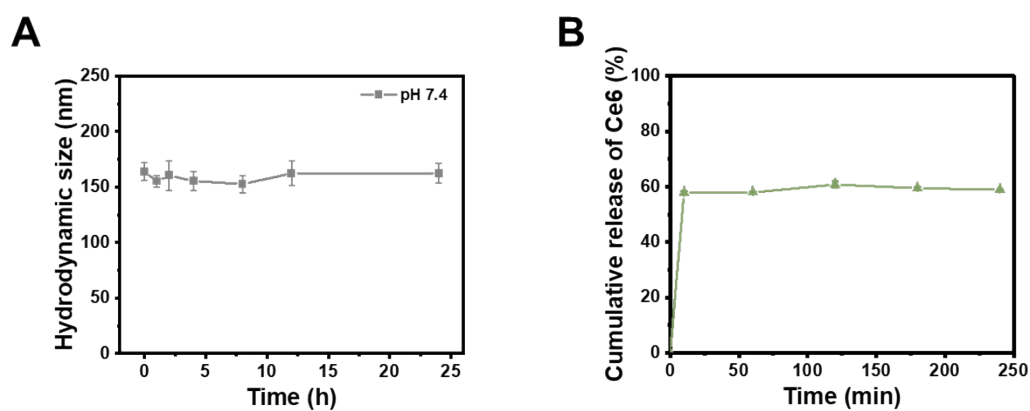

Fig. S3 (A) Stability and (B) release profile of MH@CAT under pH 7.4.

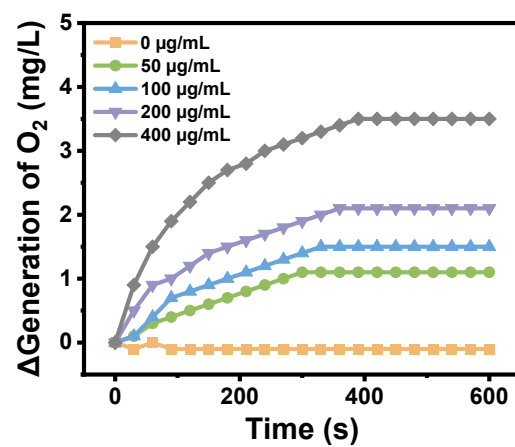

**Fig. S4**  $O_2$  generation curves after adding different concentrations of MH@CAT-Ce6 to 1 mM  $H_2O_2$  solution.

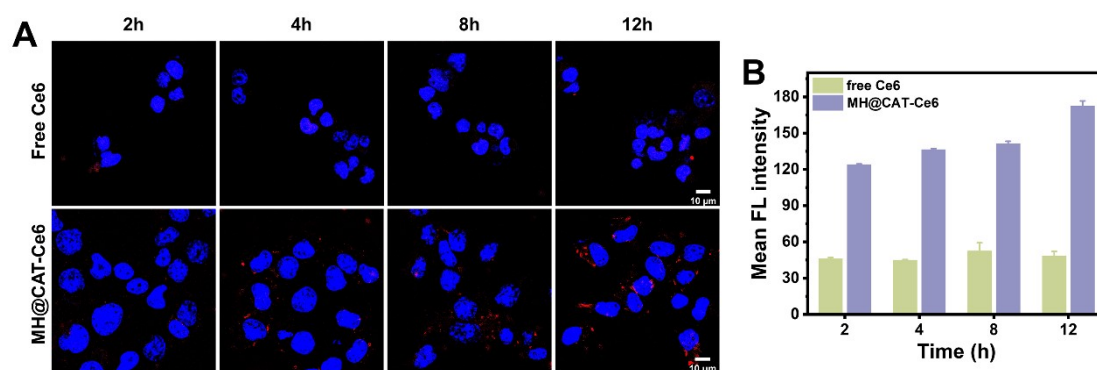

**Fig. S5** (A) Fluorescent images of 4T1 cells after incubation with MH@CAT-Ce6 for 2, 4, 8 and 12h, and stained with

Hoechst (Blue channel: Hoechst, Red channel: Ce6). (B) Ce6 fluorescence intensities of cells at different time points.

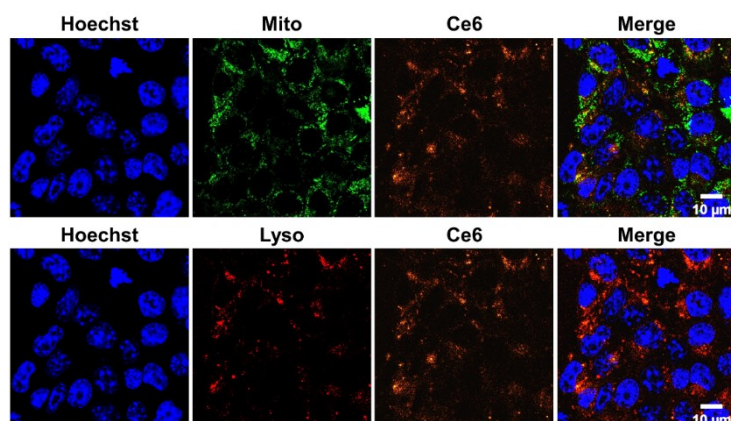

**Fig. S6** Intracellular distribution of Ce6 in 4T1 cells after incubated with MH@CAT-Ce6.

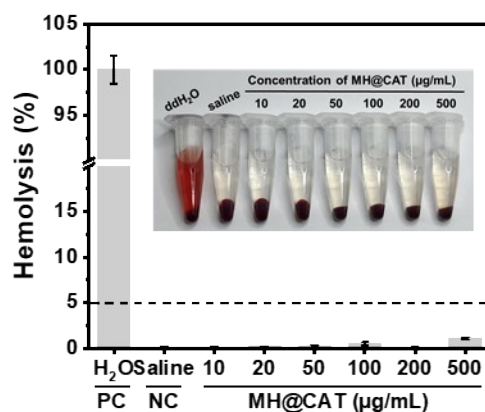

**Fig. S7** Photographs of hemolysis experiments and hemolysis rate detection of MH@CAT-Ce6.

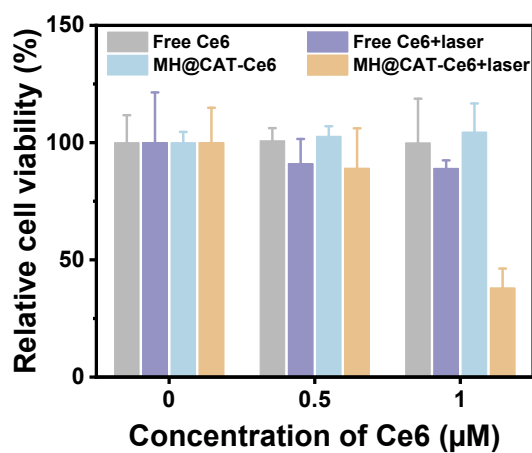

**Fig. S8** Comparison the PDT activities between free Ce6 and MH@CAT-Ce6 on MDA-MB-231 cells in the absence of

H<sub>2</sub>O<sub>2</sub> with or without laser.

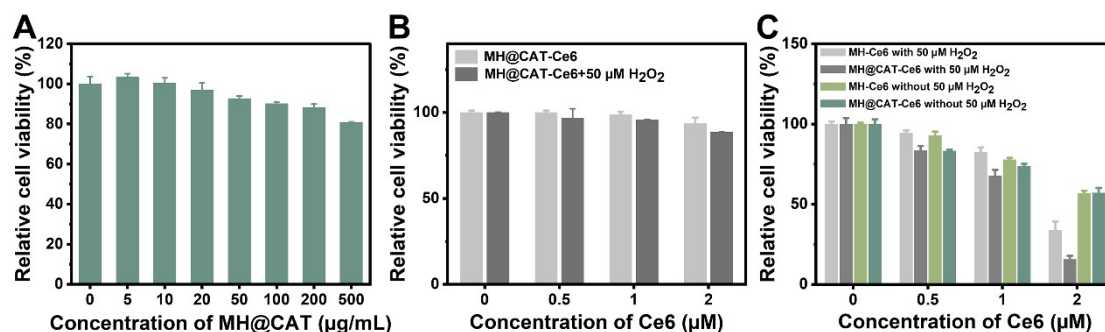

**Fig. S9** (A) Cytotoxicity evaluation of various concentrations of MH@CAT on 4T1 cells. (B) Cytotoxicity test of MH@CAT-Ce6 on 4T1 cells with or without H<sub>2</sub>O<sub>2</sub> in the absence of light irradiation. (C) PDT effect of MH-Ce6 or MH@CAT-Ce6 on 4T1 cells with or without H<sub>2</sub>O<sub>2</sub>, under 650 nm light irradiation (20 mW·cm<sup>-2</sup> for 15 min) in a nitrogen atmosphere.

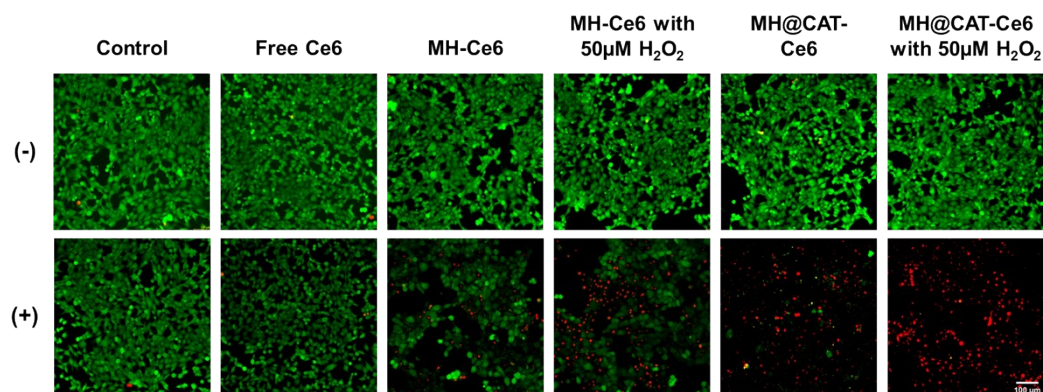

**Fig. S10** Live/dead fluorescence staining images of 4T1 cells with (+) or without (-) irradiation. Green channel: live cells.

Red channel: dead cells.

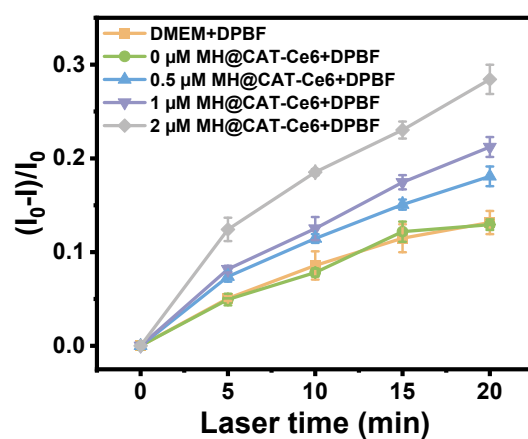

**Fig. S11** Intracellular  $^1\text{O}_2$  production of 4T1 cells examined using DPBF as the indicator under 650 nm light irradiation (20 mW·cm<sup>-2</sup> for 20 min) in a nitrogen atmosphere.

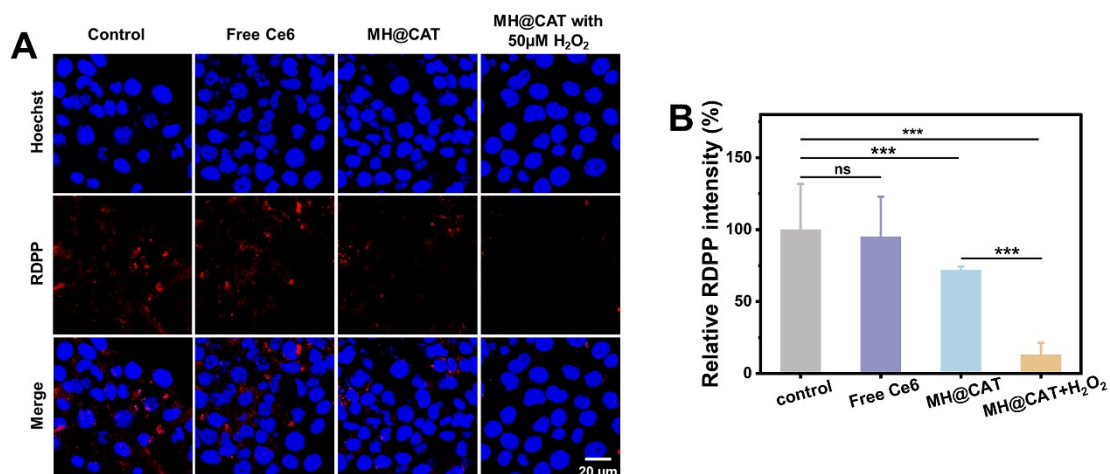

**Fig. S12** (A) Intracellular  $\text{O}_2$  generation of 4T1 cells determined by RDPP. (B) Relative RDPP intensity after various treatments.

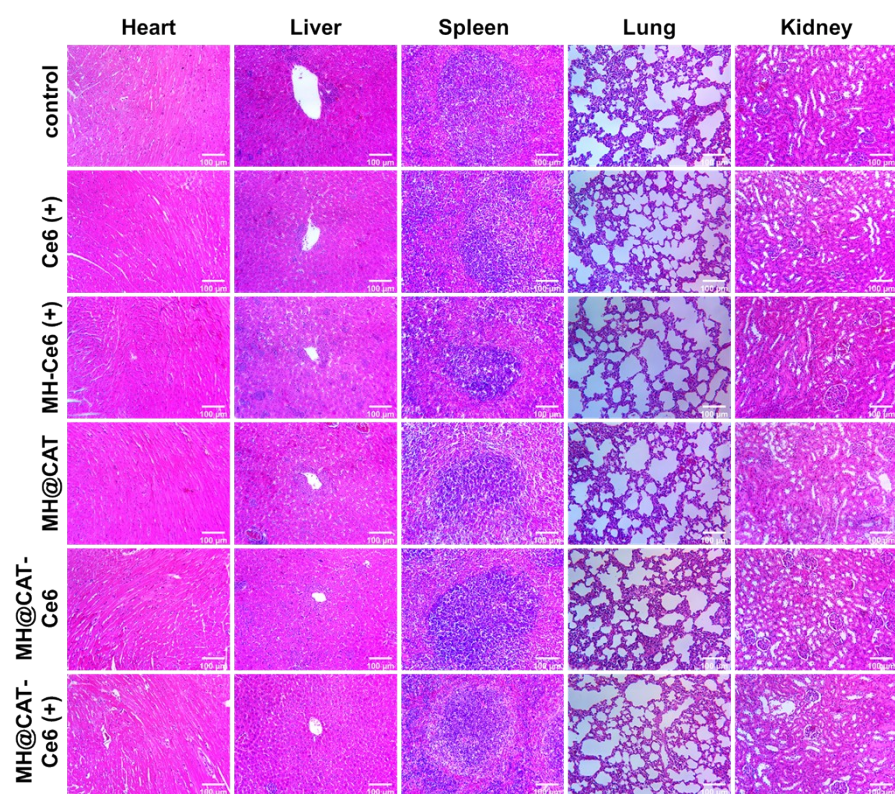

**Fig. S13.** H&E staining images of the major organs from 4T1 tumor-bearing mice collected at the end of the treatment period.
